# Supplementary material for: A phase I study of afatinib combined with paclitaxel and bevacizumab in patients with advanced solid tumors
Source: PubMed Central journal article supplement (PMC5225194; doi:10.1007/s00280-016-3189-1), 2016-11-21
Supplement: 280_2016_3189_MOESM1_ESM.pdf [file 280_2016_3189_MOESM1_ESM.pdf]

**Supplemental Table 1.** Comparison of observed and simulated bevacizumab plasma concentrations after infusion of 5 mg/kg bevacizumab every other week

| Concentration                                      | <i>N</i> | Percentile                | Observed value | Simulated value  | Deviation |
|----------------------------------------------------|----------|---------------------------|----------------|------------------|-----------|
| End of 1 <sup>st</sup> infusion                    | 14       | 25 <sup>th</sup>          | 84.2           | 104 (83.7–122)   | 22.9      |
| of Cycle 1                                         |          | 50 <sup>th</sup> (median) | 119            | 123 (104–144)    | 3.49      |
|                                                    |          | 75 <sup>th</sup>          | 159            | 147 (122–175)    | -7.85     |
| 24 h after 1 <sup>st</sup> infusion of Cycle 1     | 14       | 25 <sup>th</sup>          | 59.9           | 79.3 (63.5–95.0) | 32.3      |
|                                                    |          | 50 <sup>th</sup> (median) | 94.5           | 95.2 (79.7–112)  | 0.745     |
|                                                    |          | 75 <sup>th</sup>          | 119            | 113 (94.8–134)   | -5.19     |
| Shortly before 2 <sup>nd</sup> infusion of Cycle 1 | 13       | 25 <sup>th</sup>          | 15.7           | 19.5 (12.4–27.0) | 24.5      |
|                                                    |          | 50 <sup>th</sup> (median) | 20.5           | 26.2 (19.4–32.9) | 27.9      |
|                                                    |          | 75 <sup>th</sup>          | 24.5           | 33.5 (25.8–42.1) | 36.8      |
| End of 2 <sup>nd</sup> infusion of Cycle 1         | 14       | 25 <sup>th</sup>          | 111            | 124 (102–147)    | 12.0      |
|                                                    |          | 50 <sup>th</sup> (median) | 154            | 149 (127–175)    | -3.85     |
|                                                    |          | 75 <sup>th</sup>          | 168            | 176 (150–208)    | 5.08      |
| 24 h after 2 <sup>nd</sup> infusion of Cycle 1     | 14       | 25 <sup>th</sup>          | 82.6           | 100 (83.3–119)   | 21.5      |
|                                                    |          | 50 <sup>th</sup> (median) | 104            | 120 (103–140)    | 16.1      |
|                                                    |          | 75 <sup>th</sup>          | 122            | 144 (122–167)    | 17.9      |
| Shortly before 2 <sup>nd</sup> infusion of Cycle 4 | 1        | 50 <sup>th</sup> (median) | 58.7           | 46.1 (14.7–91.0) | -21.5     |
| 24 h after 2 <sup>nd</sup> infusion of Cycle 4     | 2        | 50 <sup>th</sup> (median) | 239            | 204 (143–274)    | -14.8     |

|                                                          |   |                           |      |                 |       |
|----------------------------------------------------------|---|---------------------------|------|-----------------|-------|
| Shortly before 1 <sup>st</sup><br>infusion of Cycle<br>5 | 2 | 50 <sup>th</sup> (median) | 70.1 | 62.1 (31.2–105) | -11.4 |
| End of 1 <sup>st</sup> infusion<br>of Cycle 5            | 2 | 50 <sup>th</sup> (median) | 182  | 201 (145–276)   | 10.4  |

---
